# Supplementary material
Source: PubMed Central journal article supplement (PMC6773556)
Supplement: 154061_0_supp_356810_p70724.pdf [file 154061_0_supp_356810_p70724.pdf]

Supplemental Table S1. The number of identified proteins in the proteome analysis of the tissue interstitial fluids

| Patient ID | Type | Replicate | No. of protein identified | FDR (%) <sup>a</sup> | No. of protein | Overlap (%) <sup>b</sup> |
|------------|------|-----------|---------------------------|----------------------|----------------|--------------------------|
| P01        | TIF  | Exp. 1    | 1649                      | 0.06                 | 1815           | 1511 (83.3)              |
|            |      | Exp. 2    | 1677                      | 0.02                 |                |                          |
|            | NIF  | Exp. 1    | 1229                      | 0.04                 | 1416           | 1118 (79.0)              |
|            |      | Exp. 2    | 1305                      | <0.01                |                |                          |
| P02        | TIF  | Exp. 1    | 1952                      | 0.03                 | 2118           | 1786 (84.3)              |
|            |      | Exp. 2    | 1952                      | 0.06                 |                |                          |
|            | NIF  | Exp. 1    | 1083                      | 0.04                 | 1226           | 980 (79.9)               |
|            |      | Exp. 2    | 1123                      | <0.01                |                |                          |
| P04        | TIF  | Exp. 1    | 1813                      | 0.02                 | 1952           | 1660 (85.0)              |
|            |      | Exp. 2    | 1799                      | 0.04                 |                |                          |
|            | NIF  | Exp. 1    | 1120                      | 0.02                 | 1228           | 996 (81.1)               |
|            |      | Exp. 2    | 1104                      | 0.03                 |                |                          |
| P05        | TIF  | Exp. 1    | 1634                      | 0.07                 | 1740           | 1401 (80.5)              |
|            |      | Exp. 2    | 1507                      | 0.03                 |                |                          |
|            | NIF  | Exp. 1    | 1163                      | <0.01                | 1270           | 947 (74.6)               |
|            |      | Exp. 2    | 1054                      | 0.02                 |                |                          |
| P10        | TIF  | Exp. 1    | 1553                      | 0.07                 | 1719           | 1390 (80.9)              |
|            |      | Exp. 2    | 1556                      | 0.04                 |                |                          |
|            | NIF  | Exp. 1    | 1109                      | <0.01                | 1239           | 961 (77.6)               |
|            |      | Exp. 2    | 1091                      | 0.08                 |                |                          |
| P12        | TIF  | Exp. 1    | 1524                      | 0.11                 | 1685           | 1279 (75.9)              |
|            |      | Exp. 2    | 1440                      | 0.03                 |                |                          |
|            | NIF  | Exp. 1    | 1104                      | 0.04                 | 1322           | 1015 (76.8)              |
|            |      | Exp. 2    | 1233                      | 0.05                 |                |                          |
| P13        | TIF  | Exp. 1    | 1969                      | 0.03                 | 2150           | 1837 (85.4)              |
|            |      | Exp. 2    | 2018                      | 0.01                 |                |                          |
|            | NIF  | Exp. 1    | 1065                      | <0.01                | 1182           | 966 (81.7)               |
|            |      | Exp. 2    | 1083                      | 0.06                 |                |                          |
| P14        | TIF  | Exp. 1    | 1275                      | 0.06                 | 1787           | 1219 (68.2)              |
|            |      | Exp. 2    | 1731                      | 0.03                 |                |                          |
|            | NIF  | Exp. 1    | 881                       | 0.03                 | 936            | 755 (80.7)               |
|            |      | Exp. 2    | 810                       | 0.09                 |                |                          |
| P15        | TIF  | Exp. 1    | 1889                      | 0.01                 | 2132           | 1772 (83.1)              |
|            |      | Exp. 2    | 2015                      | 0.05                 |                |                          |
|            | NIF  | Exp. 1    | 1685                      | 0.04                 | 1890           | 1509 (79.8)              |
|            |      | Exp. 2    | 1714                      | 0.04                 |                |                          |
| P17        | TIF  | Exp. 1    | 1803                      | 0.04                 | 1937           | 1625 (83.9)              |
|            |      | Exp. 2    | 1759                      | <0.01                |                |                          |
|            | NIF  | Exp. 1    | 988                       | <0.01                | 1048           | 840 (80.2)               |
|            |      | Exp. 2    | 900                       | <0.01                |                |                          |
| Average    | TIF  |           | 1726                      | 0.035                | 1904           | - (81.1)                 |
|            |      |           | 1142                      |                      |                |                          |
|            | NIF  |           |                           |                      | 1276           | -(79.1)                  |

<sup>a</sup> The false-discovery rate (FDR) was determined as the peptides assigned to random database over target database.

<sup>b</sup> The number of overlapping member between duplicate experiments. The percentage was determined from the number of overlaps over the number of total proteins in duplicates.

Supplemental Table S4. The possible secretion routes of proteins identified in TIFs and NIFs

| Patient ID | Type  | No. of identified proteins (percentage) |                                  |                                     |                      |                               |                    | Percentage of predicted proteins |
|------------|-------|-----------------------------------------|----------------------------------|-------------------------------------|----------------------|-------------------------------|--------------------|----------------------------------|
|            |       | Total                                   | Classical secretion <sup>a</sup> | Nonclassical secretion <sup>b</sup> | Exosome <sup>c</sup> | Membrane protein <sup>d</sup> | Other <sup>e</sup> |                                  |
| P01        | TIF   | 1815                                    | 280 (15.4)                       | 635 (35.0)                          | 785 (43.3)           | 3 (0.2)                       | 112 (6.2)          | 93.8                             |
|            | NIF   | 1416                                    | 273 (19.3)                       | 468 (33.1)                          | 599 (42.3)           | 4 (0.3)                       | 72 (5.1)           | 94.9                             |
| P02        | TIF   | 2118                                    | 276 (13.0)                       | 697 (32.9)                          | 952 (44.9)           | 5 (0.2)                       | 188 (8.9)          | 91.1                             |
|            | NIF   | 1226                                    | 244 (19.9)                       | 402 (32.8)                          | 524 (42.7)           | 5 (0.4)                       | 51 (4.2)           | 95.8                             |
| P04        | TIF   | 1952                                    | 297 (15.2)                       | 671 (34.4)                          | 819 (42.0)           | 7 (0.4)                       | 158 (8.1)          | 91.9                             |
|            | NIF   | 1228                                    | 222 (18.1)                       | 410 (33.4)                          | 523 (42.6)           | 3 (0.2)                       | 70 (5.7)           | 94.3                             |
| P05        | TIF   | 1740                                    | 246 (14.1)                       | 592 (34.0)                          | 786 (45.2)           | 4 (0.2)                       | 112 (6.4)          | 93.6                             |
|            | NIF   | 1270                                    | 246 (19.4)                       | 395 (31.1)                          | 562 (44.3)           | 4 (0.3)                       | 63 (5.0)           | 95.0                             |
| P10        | TIF   | 1719                                    | 240 (14.0)                       | 601 (35.0)                          | 755 (43.9)           | 3 (0.2)                       | 120 (7.0)          | 93.0                             |
|            | NIF   | 1239                                    | 274 (22.1)                       | 402 (32.4)                          | 502 (40.5)           | 4 (0.3)                       | 57 (4.6)           | 95.4                             |
| P12        | TIF   | 1685                                    | 232 (13.8)                       | 568 (33.7)                          | 764 (45.3)           | 4 (0.2)                       | 117 (6.9)          | 93.1                             |
|            | NIF   | 1322                                    | 244 (18.5)                       | 442 (33.4)                          | 562 (42.5)           | 4 (0.3)                       | 70 (5.3)           | 94.7                             |
| P13        | TIF   | 2150                                    | 297 (13.8)                       | 746 (34.7)                          | 922 (42.9)           | 6 (0.3)                       | 179 (8.3)          | 91.7                             |
|            | NIF   | 1182                                    | 259 (21.9)                       | 396 (33.5)                          | 475 (40.2)           | 2 (0.2)                       | 50 (4.2)           | 95.8                             |
| P14        | TIF   | 1787                                    | 211 (11.8)                       | 587 (32.8)                          | 822 (46.0)           | 5 (0.3)                       | 162 (9.1)          | 90.9                             |
|            | NIF   | 936                                     | 184 (19.7)                       | 307 (32.8)                          | 419 (44.8)           | 2 (0.2)                       | 24 (2.6)           | 97.4                             |
| P15        | TIF   | 2132                                    | 250 (11.7)                       | 708 (33.2)                          | 949 (44.5)           | 6 (0.3)                       | 219 (10.3)         | 89.7                             |
|            | NIF   | 1890                                    | 277 (14.7)                       | 677 (35.8)                          | 796 (42.1)           | 7 (0.4)                       | 133 (7.0)          | 93.0                             |
| P17        | TIF   | 1937                                    | 249 (12.9)                       | 641 (33.1)                          | 892 (46.1)           | 2 (0.1)                       | 153 (7.9)          | 92.1                             |
|            | NIF   | 1048                                    | 197 (18.8)                       | 344 (32.8)                          | 456 (43.5)           | 2 (0.2)                       | 49 (4.7)           | 95.3                             |
| All        | TIF   | 3068                                    | 436 (14.2)                       | 1019 (33.2)                         | 1218 (39.7)          | 11 (0.4)                      | 384 (12.5)         | 87.5                             |
|            | NIF   | 2240                                    | 381 (17.0)                       | 793 (35.4)                          | 881 (39.3)           | 13 (0.6)                      | 172 (7.7)          | 92.3                             |
|            | Total | 3313                                    | 516 (15.6)                       | 1094 (33.0)                         | 1262 (38.1)          | 18 (0.5)                      | 423 (12.8)         | 87.2                             |

<sup>a</sup> Proteins predicted by the SignalP program to be secreted via the classical secretion pathway (SignalP probability > 0.90).

<sup>b</sup> Proteins predicted to be secreted by the nonclassical secretion pathway using SignalP and SecretomeP (SignalP probability < 0.90 and SecretomeP score > 0.50).

<sup>c</sup> Proteins with SignalP probability < 0.90 and SecretomeP score < 0.50 are present in ExoCarta database.

<sup>d</sup> Proteins predicted by the TMHMM to form integral membrane proteins that were not predicted to be secreted via the classical, nonclassical secretion and exosome.

<sup>e</sup> Proteins that could not be classified as classical, nonclassical, exosome, or membrane proteins.

Supplemental Table S6. Number of proteins differentially expressed in each TIF sample

| Characteristics               | OSCC patients |      |      |      |      |      |      |      |      |      | Average |
|-------------------------------|---------------|------|------|------|------|------|------|------|------|------|---------|
|                               | P01           | P02  | P04  | P05  | P10  | P12  | P13  | P14  | P15  | P17  |         |
| No. of proteins               | 2029          | 2306 | 2093 | 1943 | 1969 | 1912 | 2278 | 1953 | 2477 | 2080 | 2057    |
| SD <sup>a</sup>               | 2.13          | 2.20 | 2.17 | 2.17 | 2.32 | 2.10 | 2.14 | 2.30 | 2.11 | 2.21 | 2.19    |
| Over-expression <sup>b</sup>  | 196           | 312  | 254  | 207  | 234  | 205  | 325  | 260  | 232  | 279  | 250     |
| Under-expression <sup>c</sup> | 146           | 81   | 107  | 105  | 162  | 124  | 97   | 106  | 159  | 96   | 118     |

<sup>a</sup> Standard deviation (SD) for all the TIF/NIF ratios of proteins in each sample.

<sup>b</sup> Number of proteins with ratios above mean plus one SD and FDR < 0.1.

<sup>c</sup> Number of proteins with ratios less mean minus one SD and FDR < 0.1.
