# Supplementary material
Source: PubMed Central journal article supplement (PMC6773556)
Supplement: 154061_0_supp_356824_p5072f.pdf [file 154061_0_supp_356824_p5072f.pdf]

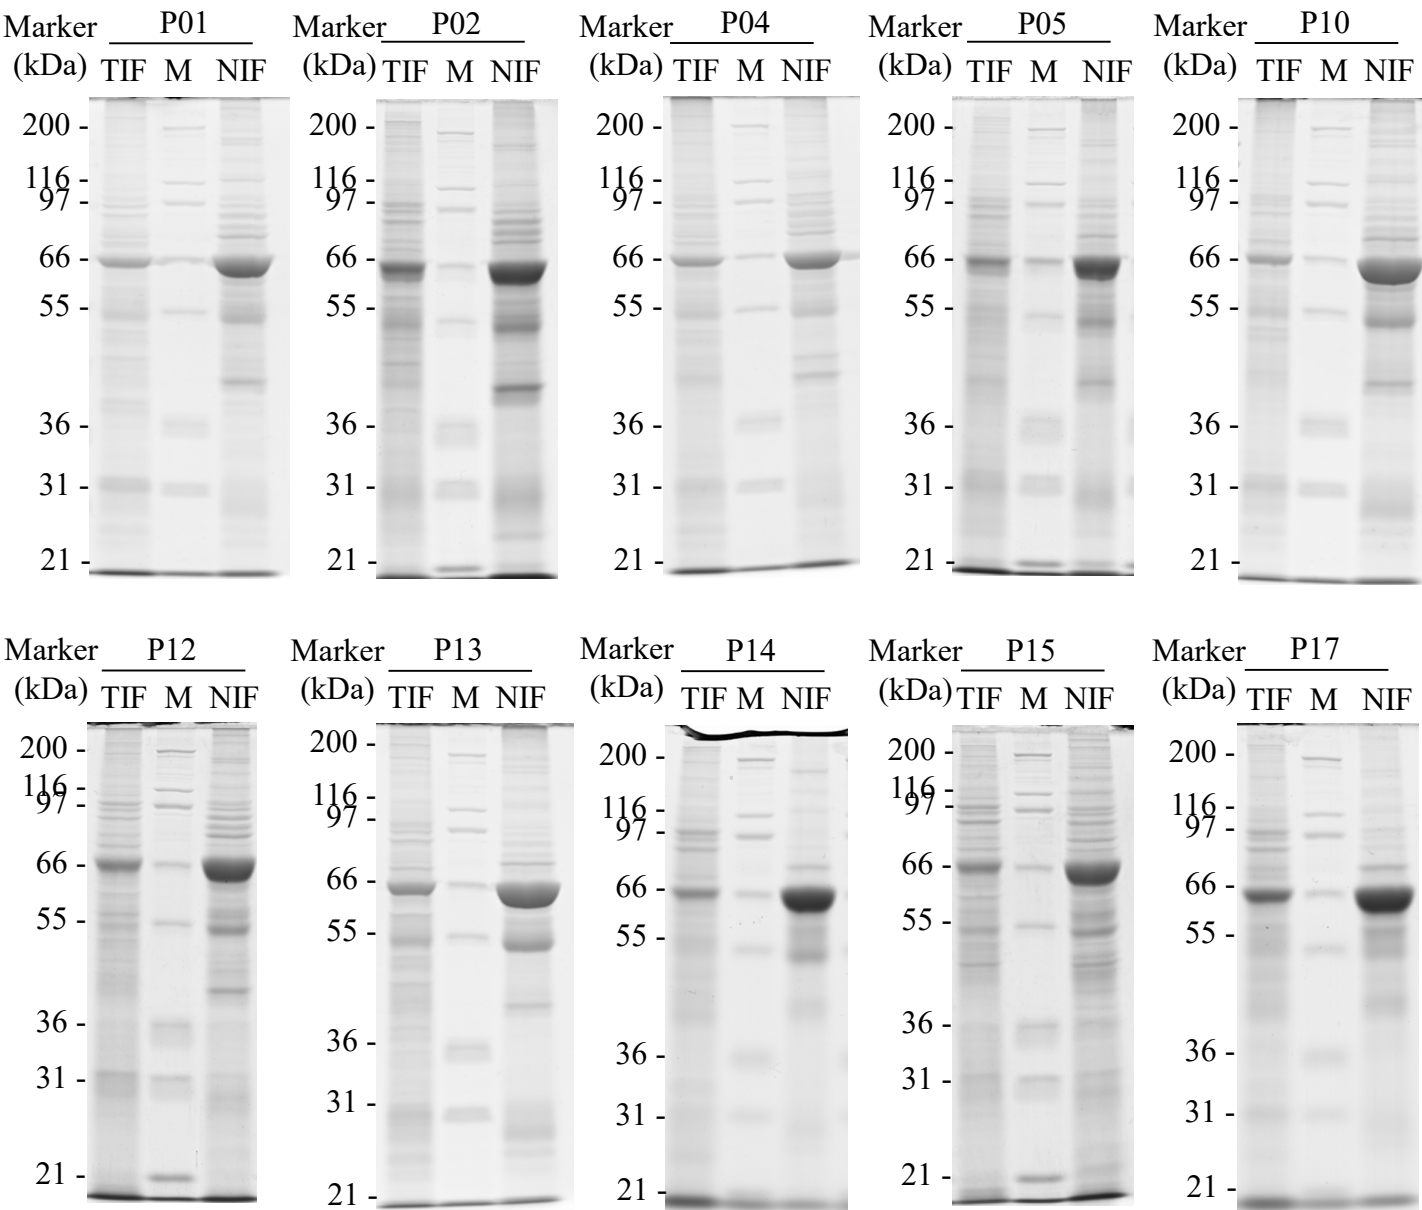

Supplemental Figure S1. Collection of ten pairs of TIF and NIF samples from OSCC patients. The collected proteins were separated by 10% SDS-PAGE and visualized by Coomassie blue staining. M, M12 maker.

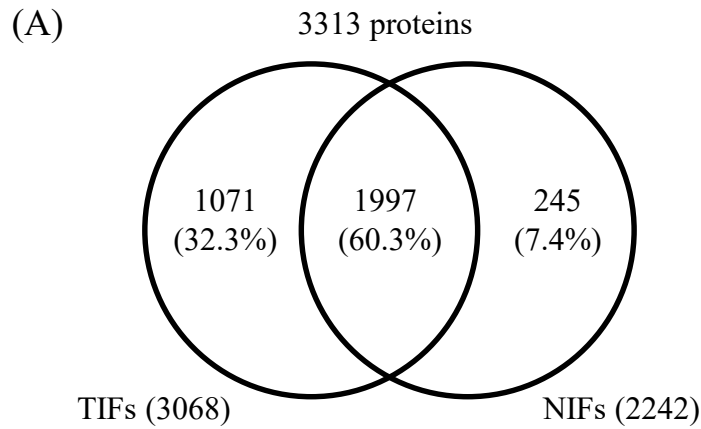

(B)

| Detected in<br>no. of samples | No. of proteins (%) |            |
|-------------------------------|---------------------|------------|
|                               | TIF                 | NIF        |
| 1                             | 506 (16.5)          | 457 (20.4) |
| 2                             | 277 (9.0)           | 232 (10.3) |
| 3                             | 233 (7.6)           | 175 (7.8)  |
| 4                             | 150 (4.9)           | 128 (5.7)  |
| 5                             | 150 (4.9)           | 109 (4.9)  |
| 6                             | 134 (4.4)           | 110 (4.9)  |
| 7                             | 158 (5.1)           | 98 (4.4)   |
| 8                             | 177 (5.8)           | 126 (5.6)  |
| 9                             | 230 (7.5)           | 170 (7.6)  |
| 10                            | 1053 (34.3)         | 637 (28.4) |
| Sum                           | 3068 (100)          | 2242 (100) |

Supplemental Figure S2. (A) The Venn diagram and (B) distribution of the identified proteins among TIF and NIF samples.

(A) TIFs (3068)

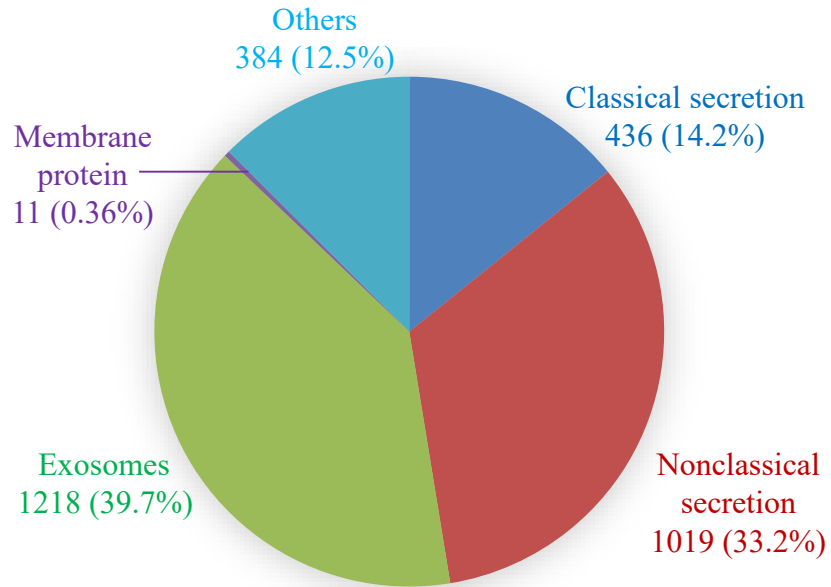

(B) NIFs (2242)

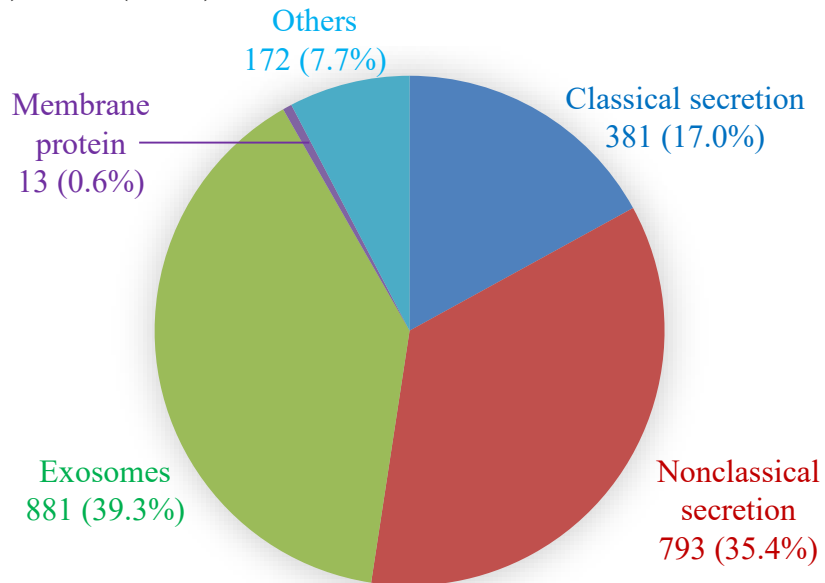

Supplemental Figure S3. The pie chart of possible secretion routes of the proteins identified in (A) TIFs and (B) NIFs.

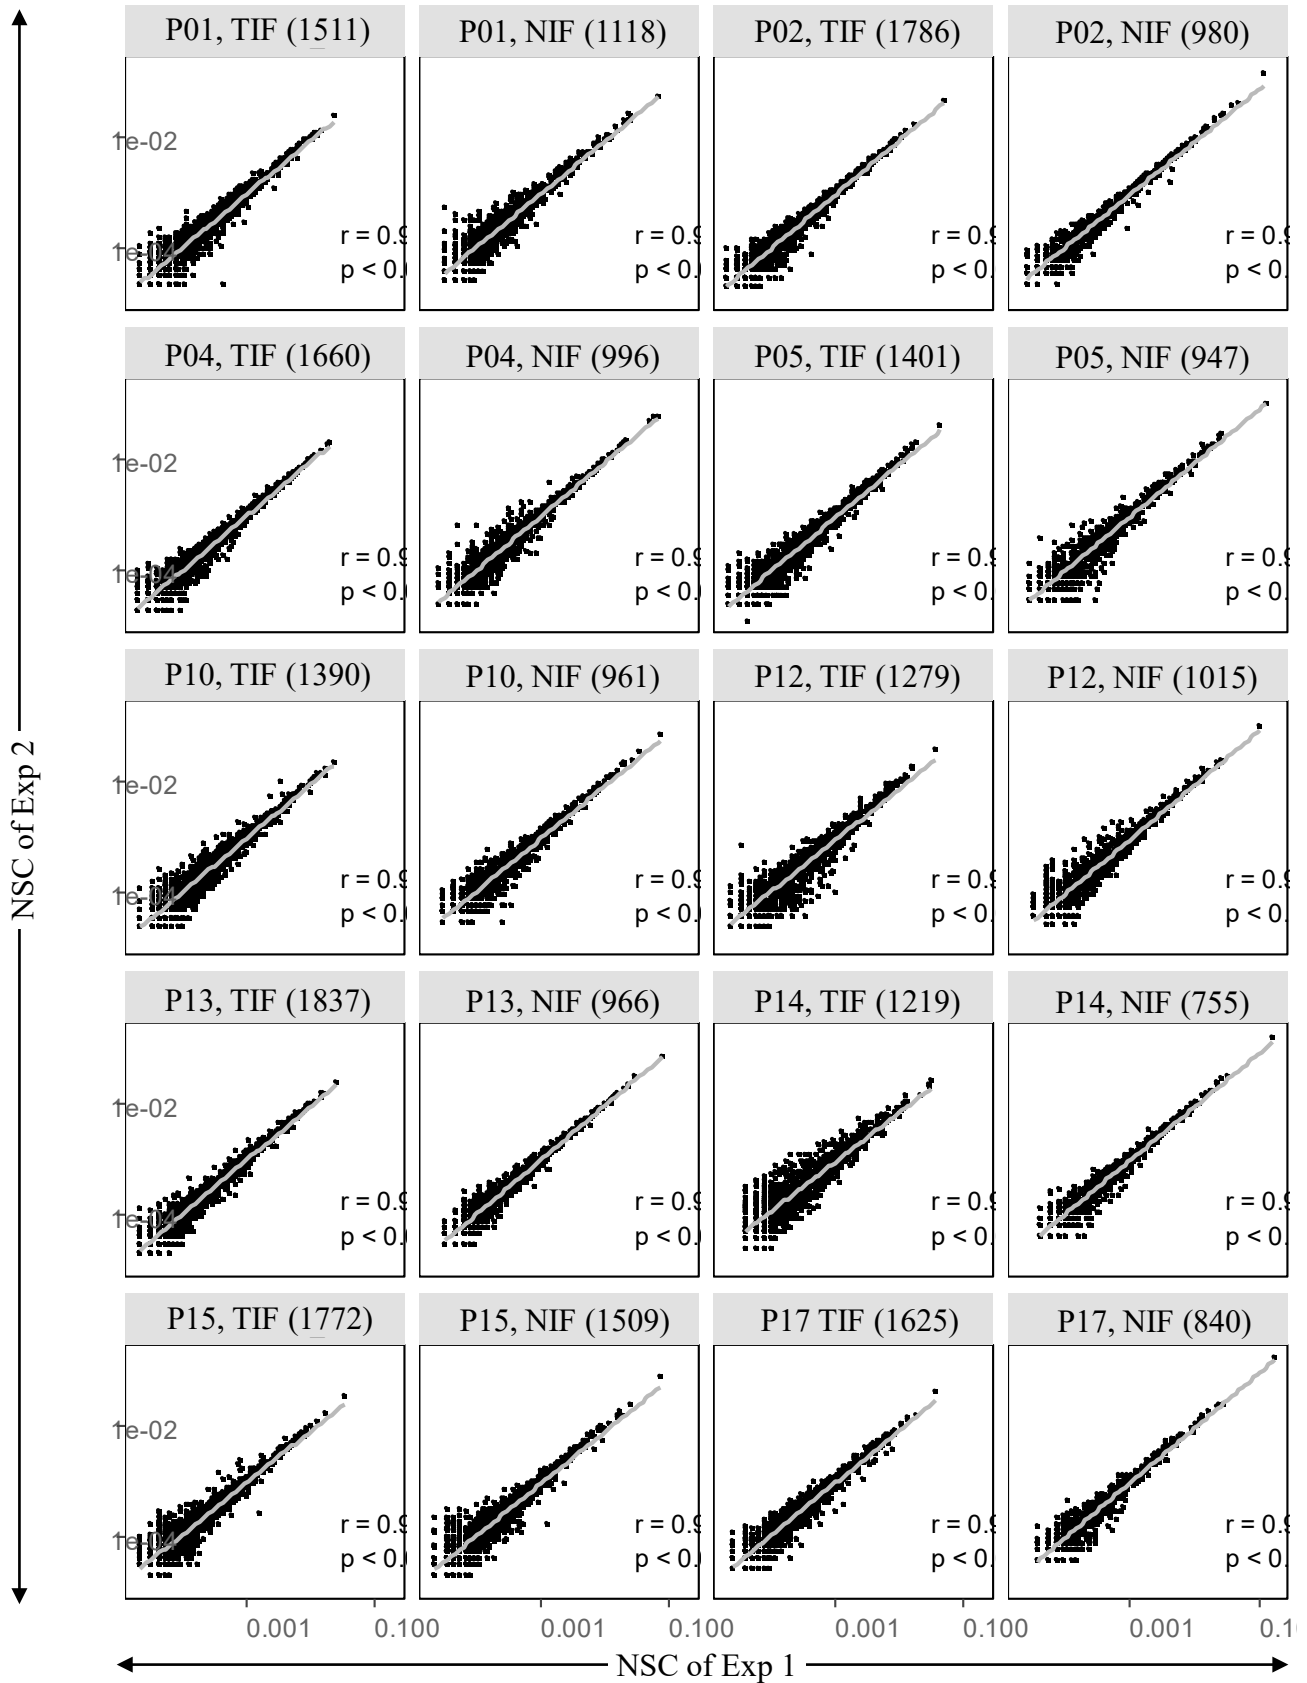

Supplemental Figure S4. The correlations of the overlapping members of each duplicate experiments. The number of overlapping proteins was indicated in brackets. The normalized spectral counts (NSC), spectra for each protein over the total spectral number, of the overlap proteins were compared between the duplicate experiments.

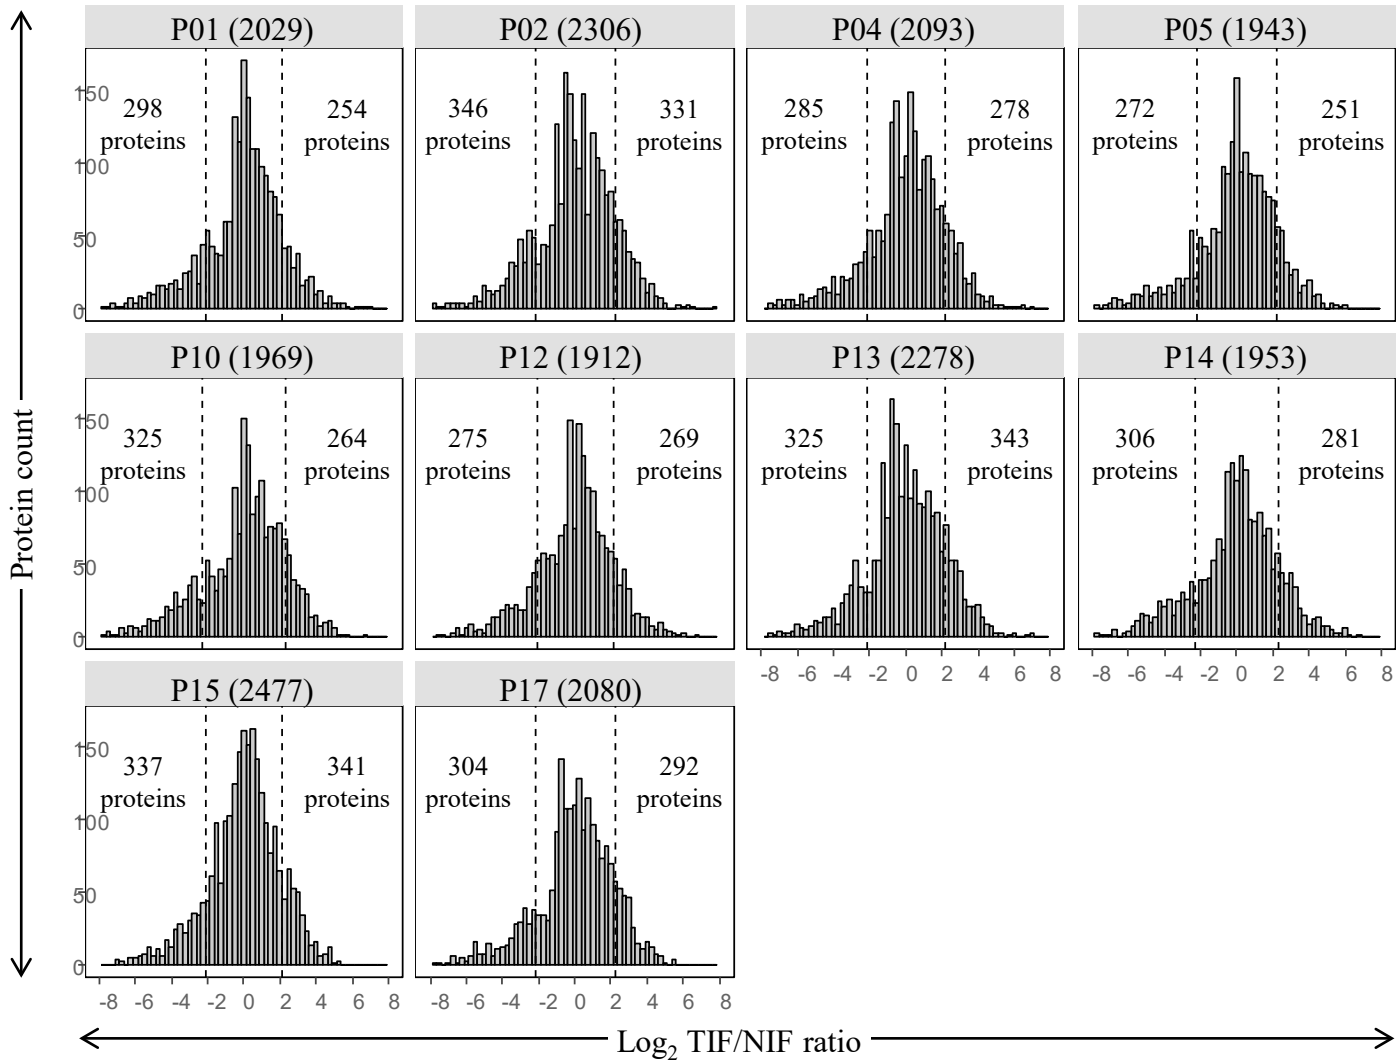

Supplemental Figure S5. The distribution of TIF/NIF ratios of the proteins identified in paired interstitial fluids from ten OSCC patients. The distribution of  $\log_2$  TIF/NIF ratios of the proteins with an interval of 0.25. Each bar represents the  $\log_2$  protein ratio and frequency shown on the x-axis and y-axis, respectively. The dotted lines indicate the mean ratio  $\pm$  1SD.
